# Supplementary material for: Label-free detection of Pb2+ based on aggregation-induced emission enhancement of Au-nanoclusters
Source: Royal Society of Chemistry journal article supplement (doi:10.1039/c5ra03449c), 2015-01-01
Supplement: c5ra03449c1.pdf [file c5ra03449c1.pdf]

*Electronic supplementary information*

Label-free detection of  $\text{Pb}^{2+}$  based on aggregation-induced emission  
enhancement of Au-nanoclusters

Liya Ji,<sup>a,b,†</sup> Yahui Guo,<sup>b,c,†</sup> Shanni Hong,<sup>b</sup> Zhili Wang,<sup>b</sup> Kewei Wang,<sup>b</sup> Xing Chen,<sup>b</sup> Jianye Zhang,<sup>a</sup> Jiming Hu<sup>c\*</sup> and Renjun Pei<sup>b\*</sup>

<sup>a</sup> College of Chemistry and Molecular Engineering, Zhengzhou University, Zhengzhou, 450001, P. R. China.

<sup>b</sup> Key Laboratory of Nano-Bio Interface, Division of Nanobiomedicine, Suzhou Institute of Nano-Tech and Nano-Bionics, Chinese Academy of Sciences, Suzhou, 215123, P.R. China.

<sup>c</sup> Key Laboratory of Analytical Chemistry for Biology and Medicine (Ministry of Education), College of Chemistry & Molecular Sciences, Wuhan University, Wuhan, 430072, P.R. China.

† The authors contributed equally to this work.

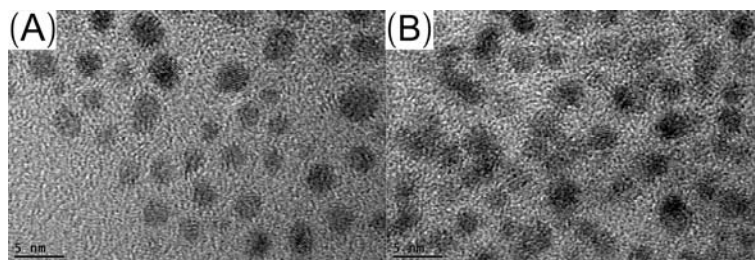

**Fig. S1.** TEM images of GSH-AuNCs in the absence (A) and presence (B) of Pb<sup>2+</sup>.

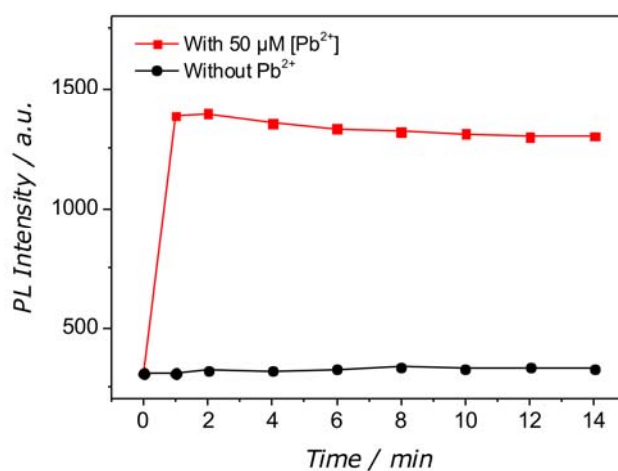

**Fig. S2.** The luminescent intensity changes of GSH-AuNCs in the absence and presence of Pb<sup>2+</sup> respectively as a function of time.

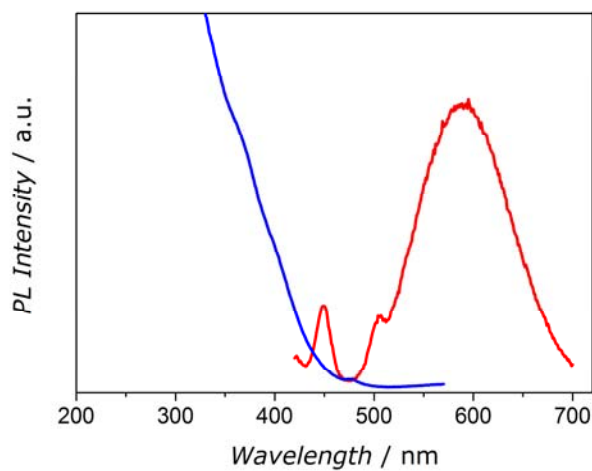

**Fig. S3.** Photoexcitation (blue line, λ<sub>em</sub> = 590 nm), photoemission (red line, λ<sub>ex</sub> = 390 nm) spectra of GSH-AuNCs aggregates (with Pb<sup>2+</sup>).

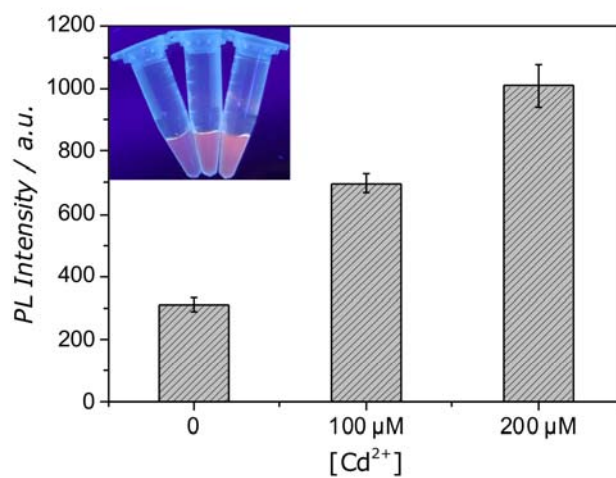

**Fig. S4.** Luminescent intensities of GSH-AuNCs in the presence of different concentrations of  $\text{Cd}^{2+}$ . Inset: digital photographs of samples with different concentrations of  $\text{Cd}^{2+}$  under UV light.

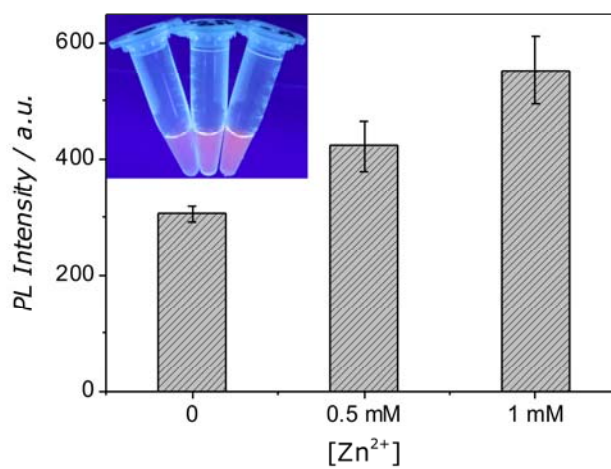

**Fig. S5.** Luminescent intensities of GSH-AuNCs in the presence of different concentrations of  $\text{Zn}^{2+}$ . Inset: digital photographs of samples with different concentrations of  $\text{Zn}^{2+}$  under UV light.

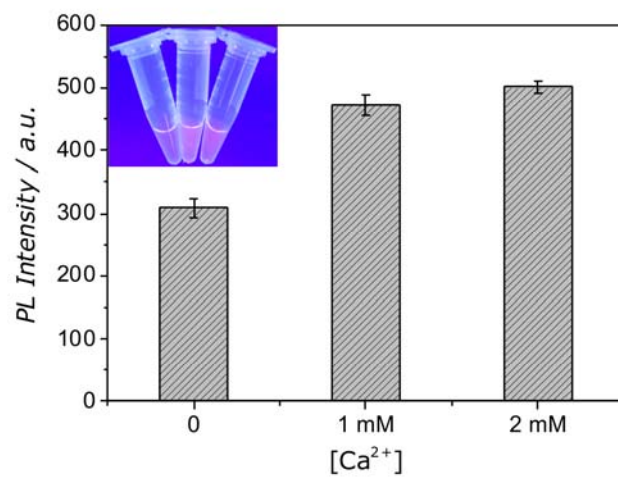

**Fig. S6.** Luminescent intensities of GSH-AuNCs in the presence of different concentrations of Ca<sup>2+</sup>. Inset: digital photographs of samples with different concentrations of Ca<sup>2+</sup> under UV light.
